# Supplementary material
Source: Springer Nature journal article supplement (https://www.springermedizin.de/resource/supplementary/13011_2007_76_MOESM3_ESM.pdf/9628392)

# Mean CO level for number of cigarettes smoked

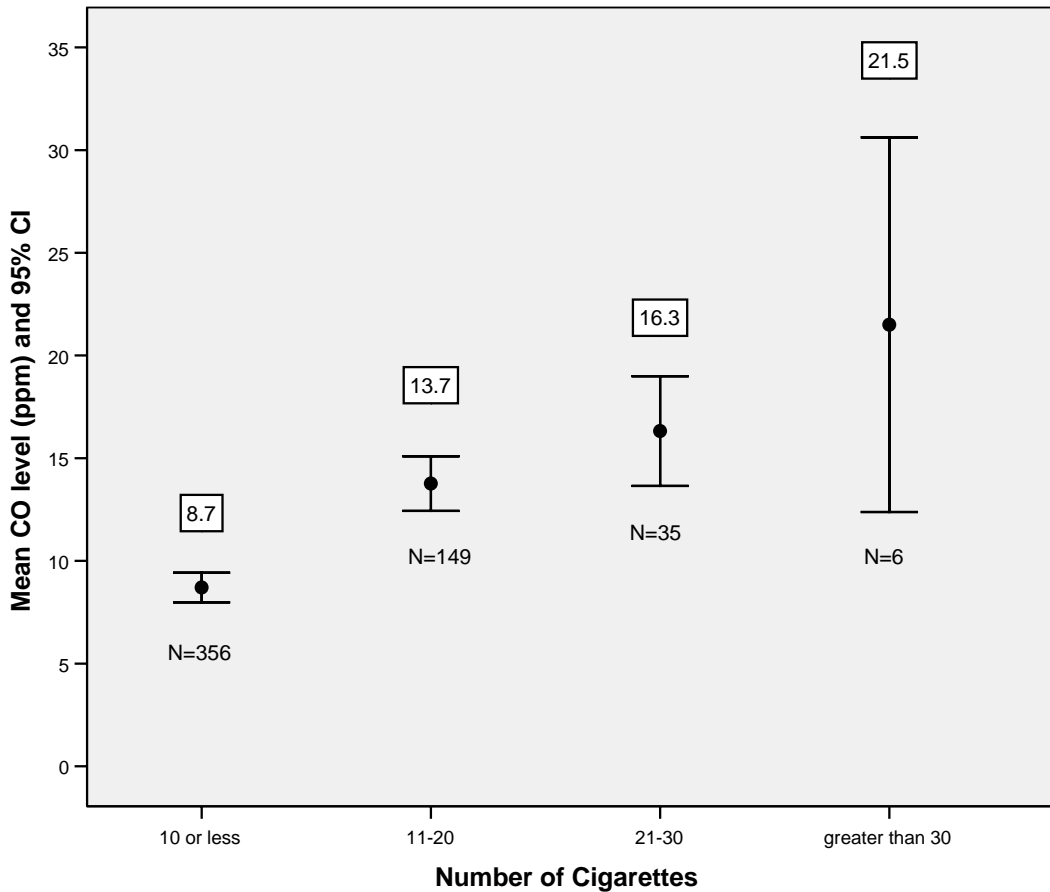

Supplement: MOESM3 [file 9628392]
